# Supplementary material for: Organic Food in the Diet of Residents of the Visegrad Group (V4) Countries—Reasons for and Barriers to Its Purchasing
Source: MDPI journal article supplement (doi:10.3390/nu13124351), 2021-12-02
Supplement: s1 [file s1]

# Attachment S1

**Table S1.** Questionnaire for organic consumers.

1. Motives to purchasing organic food: 1 – not important, 2 – low important 3 - medium important , 4 – important, 5 – very important.

| Specification                 | Grade |   |   |   |   |
|-------------------------------|-------|---|---|---|---|
|                               | 1     | 2 | 3 | 4 | 5 |
| 1. It tastes good             |       |   |   |   |   |
| 2. Low in calories            |       |   |   |   |   |
| 3. Little processed           |       |   |   |   |   |
| 4. Lots of nutritional values |       |   |   |   |   |
| 5. High health values         |       |   |   |   |   |
| 6. Environmentally friendly   |       |   |   |   |   |
| 7. No preservatives           |       |   |   |   |   |
| 8. Not genetically modified   |       |   |   |   |   |
| 9. Attractive appearance      |       |   |   |   |   |
| 10. Does not cause allergies  |       |   |   |   |   |
| 11. Free from chemicals       |       |   |   |   |   |
| 12. Other, specify.....       |       |   |   |   |   |

2. Barriers to purchasing organic food: : 1 – not important, 2 – low important 3 - medium important , 4 – important, 5 – very important..

| Specification           | Grade |   |   |   |   |
|-------------------------|-------|---|---|---|---|
|                         | 1     | 2 | 3 | 4 | 5 |
| 1. Too expensive        |       |   |   |   |   |
| 2. Not easily available |       |   |   |   |   |
| 3. Lack of trust        |       |   |   |   |   |
| 4. Short shelf life     |       |   |   |   |   |
| 5. Other, specify.....  |       |   |   |   |   |

## 3. How often do you buy organic food

- ☐ very rarely
- ☐ rarely
- ☐ moderately
- ☐ often
- ☐ very often

## 4. Your country

- ☐ Poland
- ☐ Hungary
- ☐ Czechia
- ☐ Slovakia

## 5. Your sex

- ☐ female
- ☐ male

## 6. Your Age

- ☐ from 20 to 34 years
- ☐ from 35 to 49 years
- ☐ from 50 to 65 years
- ☐ 65 years or over

Source: Own study
